# Supplementary material
Source: publisher site journal article supplement (https://www.dovepress.com/article/331140)
Supplement: Supplementary file 1 [file get_supplementary_file.php]

# Survey of symptoms following COVID-19 vaccination.

Greetings,

This is Yoseph Solomon, M.D and Assistant Professor at Debre Markos University. We are undertaking a study to gather information on post COVID-19 vaccine-related symptoms among healthcare professionals. On behalf of all authors, I would appreciate it if you complete this survey anytime after one week of your vaccination date. The information you are giving will be handled with a high sense of anonymity and confidentiality. Participation in this survey is voluntary and it takes about 2-3 minutes of your time. You have full right to withdraw from this study at any moment.

I thank you in advance!

For further queries, comments or suggestions please contact me at the following address.

Dr. Yoseph Solomon,

[josephsol87@gmail.com](mailto:josephsol87@gmail.com)

+251911335136

\* Required

## Demographics

Age, Gender and place of vaccination.

1. How old are you? \*

---

2. Gender \*

*Mark only one oval.*

☐ Male

☐ Female

3. At which health institution where you vaccinated at? \*

---

4. Do you have any of the listed known chronic medical illnesses? Multiple answer is possible. \*

*Check all that apply.*

☐ I don't have known chronic medical illness

☐ Hypertension

☐ Diabetis

☐ Asthma

☐ Heart disease

☐ Chronic renal failure

☐ Chronic liver disease

☐ Any malignancy

☐ Epilepsy

Other: ☐ \_\_\_\_\_

Injection site symptoms-1

Include pain, tenderness, swelling, and redness at the injection site.

5. Did you have an injection site symptom? \*

*Mark only one oval.*

☐ Yes

☐ No      *Skip to question 9*

Injection site symptoms-2

6. What injection site symptoms did you have? Multiple answer is possible. \*

*Check all that apply.*

- ☐ Pain
- ☐ Tenderness
- ☐ Swelling
- ☐ Redness
- ☐ Hotness (calor )

Other: ☐ \_\_\_\_\_

7. How long after vaccination did you start to feel injection site symptoms? \*

*Mark only one oval.*

- ☐ Within 6 hour after injection
- ☐ Between 6 and 12 hours
- ☐ Between 12 and 24 hours
- ☐ After 24 hours

8. For how long did the injection site symptoms last? \*

*Mark only one oval.*

- ☐ less than 24 hour
- ☐ 24 upto 72 hours
- ☐ 72 hours upto 7 days
- ☐ 7 days upto 10 days
- ☐ More than 10 days

Post COVID-19 vaccine  
mild symptoms-1

Include headache, nausea, vomiting, sore throat, fever, feeling tired;  
joint, back and muscle pain; and diarrhea.

9. Did you have any of the post-COVID-19 vaccine mild symptoms? \*

*Mark only one oval.*

☐ Yes

☐ No      *Skip to question 14*

### Post COVID-19 vaccine mild symptoms-2

10. What mild symptoms did you have? Multiple answer is possible. \*

*Check all that apply.*

- ☐ Headache
- ☐ Sleeplessness
- ☐ Nausea
- ☐ Vomiting
- ☐ Joint pain
- ☐ Back pain
- ☐ Chills
- ☐ Feeling tired
- ☐ Fever
- ☐ Myalgia (Muscle pain)
- ☐ Diarrhoea
- ☐ Sore throat
- ☐ Runny nose
- ☐ Nightmare
- ☐ Cough

Other: ☐ \_\_\_\_\_

11. How long after vaccination did you start to feel the mild symptoms? \*

*Mark only one oval.*

- ☐ Within 6 hour after injection
- ☐ Between 6 and 12 hours
- ☐ Between 12 and 24 hours
- ☐ After 24 hours

12. For how long did the mild symptoms last? \*

*Mark only one oval.*

- ☐ less than 24 hour
- ☐ 24 upto 72 hours
- ☐ 72 hours upto 7 days
- ☐ 7 days upto 10 days
- ☐ More than 10 days

13. Did you take any painkiller to alleviate the above symptoms? \*

*Mark only one oval.*

- ☐ Yes
- ☐ No

Post COVID-19 vaccine  
severe symptoms-1

Include sever headache, rash, shortness of breath, chest pain, leg swelling, and persistent abdominal pain.

14. Did you have any of the post-COVID-19 vaccine severe symptoms? \*

*Mark only one oval.*

☐ Yes

☐ No      *Skip to question 20*

#### Post COVID-19 vaccine severe symptoms-2

15. What were the severe symptoms you had? Multiple answer is possible. \*

*Check all that apply.*

☐ Severe headache that is not relieved with painkillers or is getting worse

☐ Rash that looks like small bruises or bleeding under the skin

☐ Shortness of breath

☐ Chest pain

☐ Leg swelling

☐ Persistent abdominal pain

☐ Persistent cough

☐ Dizziness

Other: ☐ \_\_\_\_\_

16. How long after vaccination did you start to feel the severe symptoms? \*

*Mark only one oval.*

☐ Within 24h after injection

☐ Between 24h and 7days

☐ Between 7 days and 14 days

☐ After 14 days

17. For how long did the severe symptoms last? \*

*Mark only one oval.*

- ☐ less than 24 hour
- ☐ 24 upto 72 hours
- ☐ 72 hours upto 7 days
- ☐ 7 days upto 10 days
- ☐ More than 10 days

18. Did you seek any medical care for your severe symptoms? \*

*Mark only one oval.*

- ☐ Yes
- ☐ No      *Skip to question 20*

19. Did you have any laboratory or other investigation confirmed blood clotting abnormality? \*

*Mark only one oval.*

- ☐ Yes
- ☐ No

Previous COVID-19 test-1

20. Did you have any COVID-19 positive test before getting vaccinated? \*

*Mark only one oval.*

- ☐ Yes
- ☐ No      *Skip to question 22*

## Previous COVID-19 test-2

21. When did you have your positive test? \*

*Mark only one oval.*

- ☐ Within 6weeks before vaccination
- ☐ More than 6 weeks before vaccination

Do you recommend the vaccine?

22. Do you recommend the vaccine to other people? \*

*Mark only one oval.*

- ☐ Yes      *Skip to question 24*
- ☐ No

Do you recommend the vaccine?

23. Do you have any reason for not recommending the vaccine? Optional

---

Will you take the next dose?

24. Do you think you will take the 2nd dose of the vaccine? \*

*Mark only one oval.*

- ☐ Yes
- ☐ No

Will you take the next dose?



25. What is your reason for planning not to take the next dose? Optional

---

---

This content is neither created nor endorsed by Google.

Google Forms
